# Supplementary material
Source: Springer Nature journal article supplement (https://www.springermedizin.de/resource/supplementary/12874_2008_336_MOESM3_ESM.pdf/9434256)
Supplement: MOESM3 [file 9434256]

## Screening & Recruitment

- Greater Lawrence Family Health Center (GLFHC) patient panel prescreened for LLDPP screening criteria
- Letters forwarded to patient providers for signature
- Patients mailed letters and called for screening appointment

- Screening consent & questionnaire completed

Measure the following:

- Weight & Height
- Blood pressure
- Check medications
- Fingertstick (FBS, Total cholesterol, HDL) &
- Stern risk calculated

Meets criteria/  
Baseline  
appointment  
scheduled

Didn't  
meet  
criteria/  
Provide  
results

Medical  
clearance  
form to  
MD

Baseline  
Appointment  
Scheduled  
when/if cleared

## Baseline & Follow-up

### Baseline Appointment

- Measures include demographics, Stern equation components, weight, glycosylated hemoglobin, diet, physical activity, depression, social support, & quality of life

### Randomization

- Usual Care
- Special Intervention

### Six-month Follow-up Appointment

- Weight measured

### One-Year Follow-up Appointment

- Measures include demographics, Stern equation components, weight, glycosylated hemoglobin, diet, physical activity, depression, social support, & quality of life.
